# Supplementary material
Source: PubMed Central journal article supplement (PMC2533248)
Supplement: 0805187105_0805187105SI.pdf [file 0805187105_0805187105SI.pdf]

# Supporting Information

Reynolds *et al.* 10.1073/pnas.0805187105

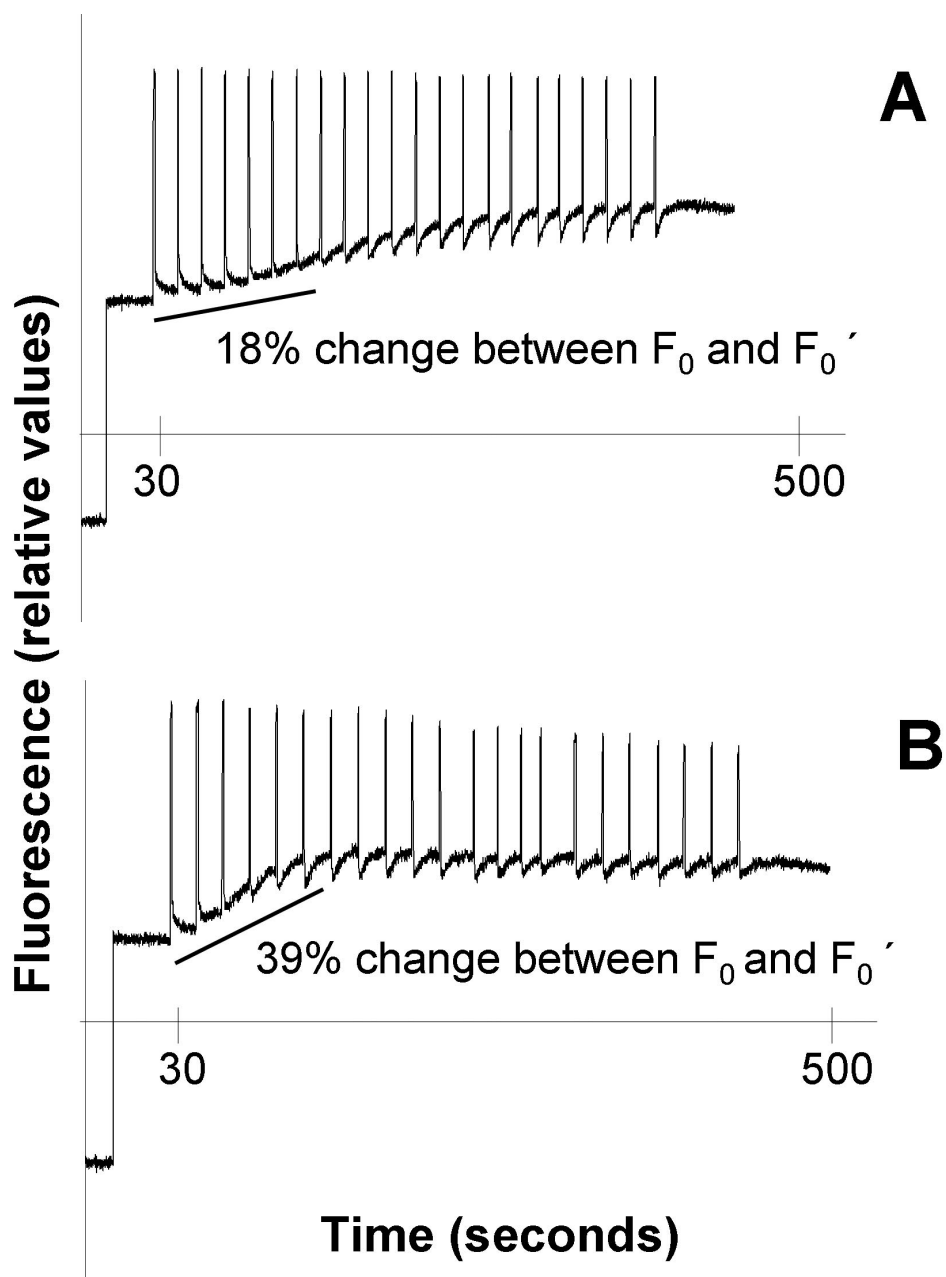

**Fig. S1.** Augmented non-linear electron transport under anaerobic conditions. Aerobic cells of culture subclade A4 (A) exhibit an 18% increase in the level of  $F_0'$  in serial irradiation pulses (SIP) progression through the sixth flash whereas an anaerobic sample of the same culture (B) shows a 39%  $F_0'$  increase. Oxygen as a downstream photosystem I (PSI) and chlororespiratory electron acceptor promotes both dark and flash-induced PQ oxidation and diminishes  $F_0'$  increases by SIP.

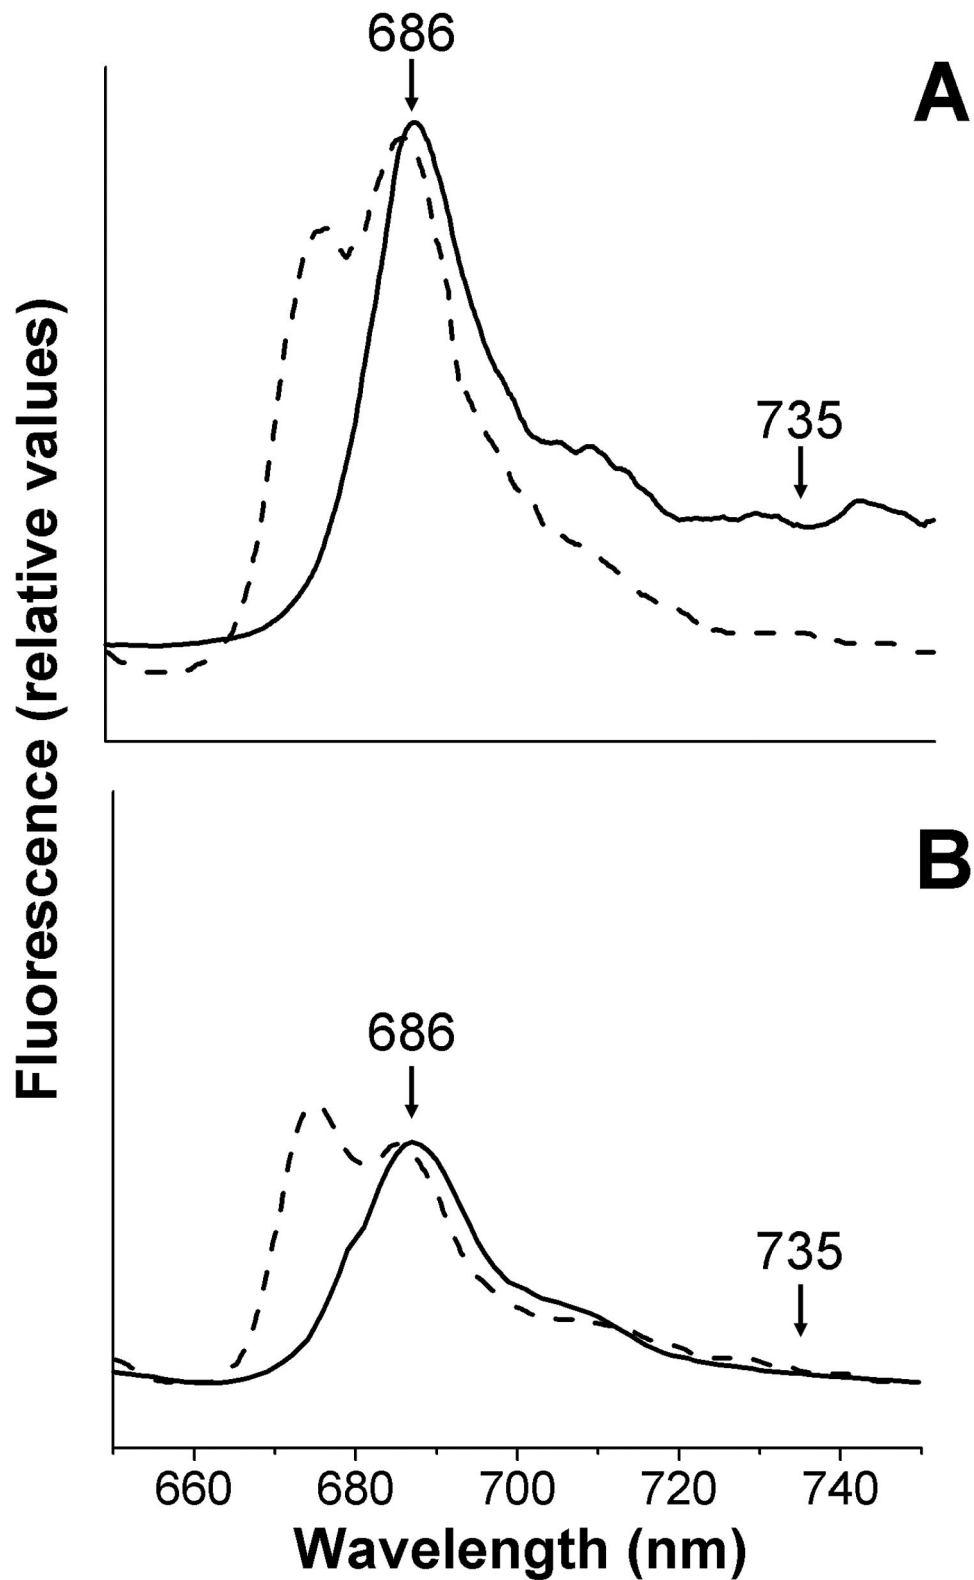

**Fig. S2.** Long wavelength emission spectra in clade A3 *Symbiodinium*. (A) The 77 K fluorescence emission spectra with excitation at 440 nm of cultured phylotype A3 *Symbiodinium* cells following a 60 min dark adaptation (solid line) and 100 min light acclimation (dashed line). (B) Emission spectra at excitation wavelengths of 530 nm following the same treatments. Dual peaks in both A and B under light acclimated conditions result from partial dissociation of peridinin–chlorophyll-*a*–proteins (PCPs) and intrinsic light-harvesting complexes (LHCs) from PSII. It is unclear to what extent PCPs and/or LHCs become associated with PSI because of the absence of a pronounced long-wavelength fluorescence peak. Both A and B were normalized to the 686-nm emission peak.

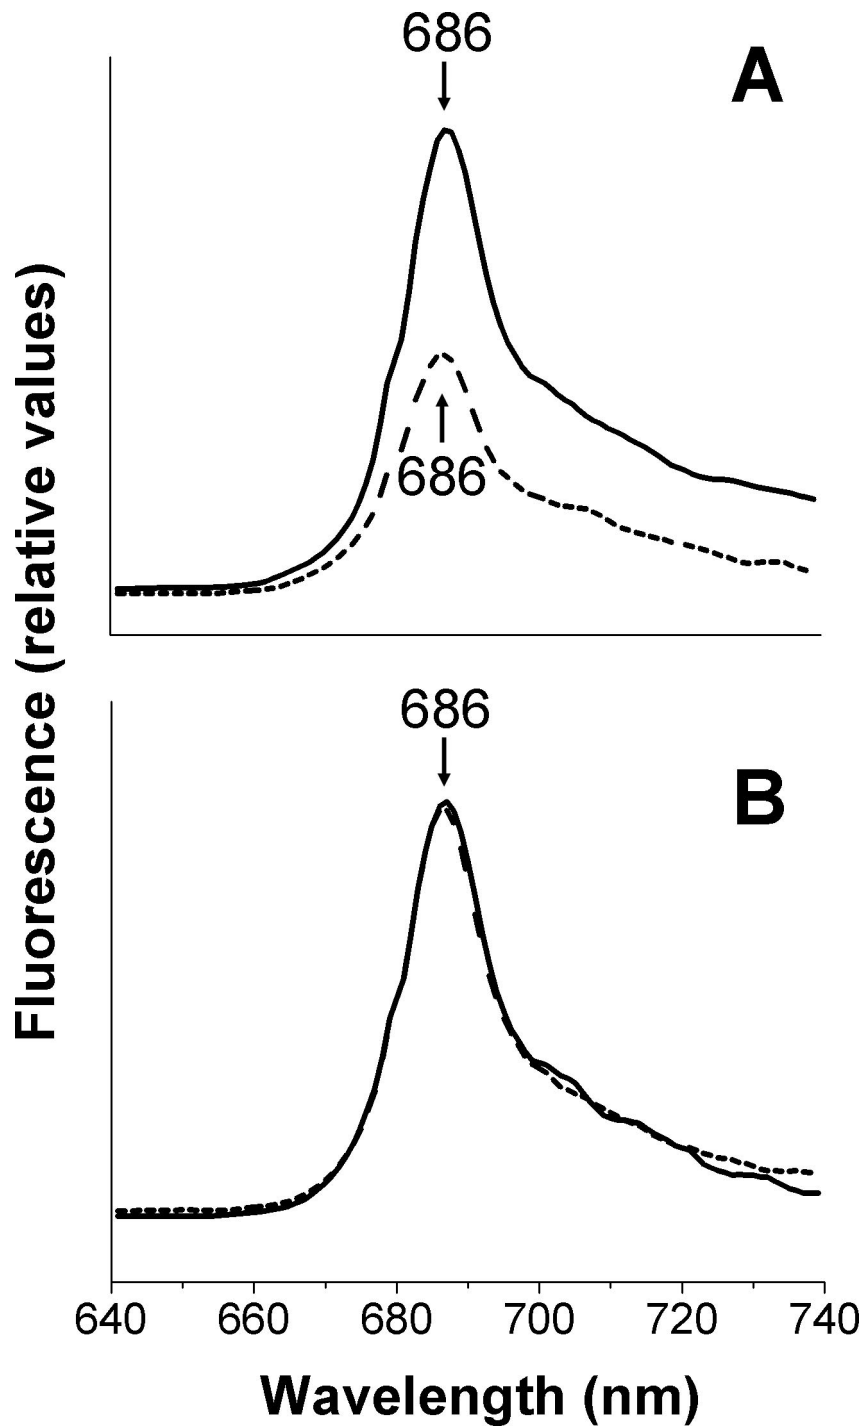

**Fig. S3.** Clades B and C LHC remain connected to PSII under high light conditions. The 77 K fluorescence emission spectra with a 440-nm excitation of phylotypes B2.1 (A) and C1 (B) from cultured *Symbiodinium* cells are identical after 60 min of dark (solid line) or high light (dashed line) acclimation. As compared with Clade A *Symbiodinium* (Fig. 4), clades B and C do not exhibit photoprotective antenna dissociation from PSII.



Table S1. Continued\*

| Clade/subclade <sup>†</sup> | Isolate number    | <i>Symbiodinium</i> species | Geographic origin | Host origin                  | CET, present or absent |
|-----------------------------|-------------------|-----------------------------|-------------------|------------------------------|------------------------|
| B1 shallow                  | <i>In hospice</i> | <i>Symbiodinium</i> sp.     | Bahamas           | <i>Montastraea faveolata</i> | Absent                 |
| C12 deep                    | <i>In hospice</i> | <i>Symbiodinium</i> sp.     | Bahamas           | <i>Montastraea faveolata</i> | Absent                 |
| B1                          | <i>In hospice</i> | <i>Symbiodinium</i> sp.     | Key Largo, FL     | <i>Montastraea annularis</i> | Absent                 |
| B1                          | <i>In hospice</i> | <i>Symbiodinium</i> sp.     | Bahamas           | <i>Montastraea annularis</i> | Absent                 |
| C3                          | <i>In hospice</i> | <i>Symbiodinium</i> sp.     | Key Largo, FL     | <i>Montastraea cavernosa</i> | Absent                 |
| C3                          | <i>In hospice</i> | <i>Symbiodinium</i> sp.     | Bahamas           | <i>Montastraea cavernosa</i> | Absent                 |
| B1 or C3                    | <i>In hospice</i> | <i>Symbiodinium</i> sp.     | Key Largo, FL     | <i>Montastraea franksi</i>   | Absent                 |
| B1 or C12                   | <i>In hospice</i> | <i>Symbiodinium</i> sp.     | Bahamas           | <i>Montastraea franksi</i>   | Absent                 |
| C3                          | <i>In hospice</i> | <i>Symbiodinium</i> sp.     | Bahamas           | <i>Siderastrea siderea</i>   | Absent                 |
| B5a or C3                   | <i>In hospice</i> | <i>Symbiodinium</i> sp.     | Key Largo, FL     | <i>S. siderea</i>            | Absent                 |
| B5                          | <i>In hospice</i> | <i>Symbiodinium</i> sp.     | Florida Bay       | <i>Siderastrea radians</i>   | Absent                 |
| B1                          | <i>In hospice</i> | <i>Symbiodinium</i> sp.     | Key Largo, FL     | <i>Mancinia aereolata</i>    | Absent                 |
| A4 + B1                     | <i>In hospice</i> | <i>Symbiodinium</i> sp.     | Key Largo, FL     | <i>Porites furcata</i>       | Present                |
| ND                          | <i>In hospice</i> | <i>Symbiodinium</i> sp.     | Key Largo, FL     | <i>P. furcata</i>            | Absent                 |
| B1                          | <i>In hospice</i> | <i>Symbiodinium</i> sp.     | Key Largo, FL     | <i>Solenastrea hyades</i>    | Absent                 |
| ND                          | <i>In hospice</i> | <i>Symbiodinium</i> sp.     | Key Largo, FL     | <i>Millipora alcicornis</i>  | Absent                 |
| ND                          | <i>In hospice</i> | <i>Symbiodinium</i> sp.     | Key Largo, FL     | <i>Porites porites</i>       | Absent                 |
| ND                          | <i>In hospice</i> | <i>Symbiodinium</i> sp.     | Bahamas           | <i>Agaricia agaricites</i>   | Absent                 |
| A4                          | <i>In hospice</i> | <i>Symbiodinium</i> sp.     | Florida Bay       | <i>Aiptasia tagetes</i>      | Present                |
| A4                          | <i>In hospice</i> | <i>Symbiodinium</i> sp.     | Florida Bay       | <i>Bartholomea annulata</i>  | Present                |
| A1                          | <i>In hospice</i> | <i>S. microadriaticum</i>   | Florida Bay       | <i>C. xamachana</i>          | Present                |

ND, Not determined.

\*Certain conditions such as increased high light exposure or high temperatures may change the response.

<sup>†</sup>Unless otherwise noted, all numbered culture clade/subclades are referenced in LaJeunesse (1).

<sup>‡</sup>*G. ventalina* has been documented as hosting a B1 *Symbiodinium* in the Florida Keys (2, 3). Culture 97 likely arose as a nonsymbiotic epiphyte.

<sup>§</sup>Referenced in Baillie et al. (4).

<sup>¶</sup>Referenced in LaJeunesse et al. (5).

1. LaJeunesse TC (2001) Investigating the biodiversity, ecology, and phylogeny of endosymbiotic dinoflagellates in the genus *Symbiodinium* using the ITS region: In search of a "species" level marker *J Phycol* 37: 866–880.
2. Santos SR, Shearer TL, Hannes AR, Coffroth MA (2004) Fine-scale diversity and specificity in the most prevalent lineage of symbiotic dinoflagellates (*Symbiodinium*, Dinophyceae) of the Caribbean *Mol Ecol* 13: 459–469.
3. Kirk NL, Ward J, Coffroth MA (2005) Stable *Symbiodinium* composition in the sea fan *Gorgonia ventalina* during temperature and disease stress *Biol Bull* 209: 227–234.
4. Baillie BK, et al. (1998) Allozyme electrophoresis as a tool for distinguishing different zooxanthellae symbiotic with giant clams. *Proc R Soc London Ser B* 265.
5. LaJeunesse TC, et al. (2005) *Symbiodinium* (Pyrrhophyta) genome sizes (DNA content) are smallest among dinoflagellates *J Phycol* 41: 880–886.
